# Supplementary material
Source: PubMed Central journal article supplement (PMC3003096)
Supplement: 1010416107_pnas.1010416107_SI.pdf [file 1010416107_pnas.1010416107_SI.pdf]

# Supporting Information

Ekberg et al. 10.1073/pnas.1010416107

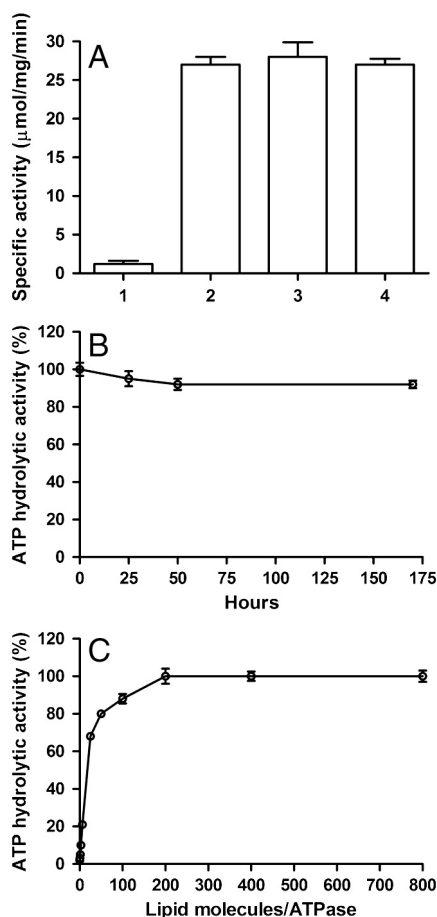

**Fig. S1.** The delipidated PM H<sup>+</sup>-ATPase is fully functional. Activity of purified PM H<sup>+</sup>-ATPase. (A) ATP hydrolytic activity of the purified H<sup>+</sup>-ATPase measured during the crystallization preparation protocol. Activities are expressed as specific activity (μmol Pi produced/min/mg protein). 1: Activity after purification and without any application of lipid molecules. 2: Activity after purification with inclusion of lipids. 3: Activity after a C<sub>12</sub>E<sub>8</sub>/Cymal-5/Sucrose step with inclusion of lipids. 4: Activity after the final ultracentrifugation step, just before crystallization set-up. (B) Time-dependent stability of the crystallization ready PM H<sup>+</sup>-ATPase with respect to ATP hydrolytic activity. Protein, just before crystallization set-up, was kept at 4 °C and the activity was measured at different time intervals. (C) Lipid requirement of the purified proton pump. Different amounts of DDM solubilized lipids were added to the PM H<sup>+</sup>-ATPase protein before activity measurements (ATP hydrolytic activity). A MW of 762 Da of the added lipids (soybean phosphatidylcholine), and a MW of 90 kDa for the PM H<sup>+</sup>-ATPase were used for the calculations.

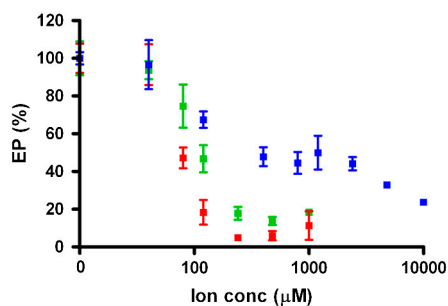

**Fig. S2.** Tb<sup>3+</sup>, Ho<sup>3+</sup>, and Ca<sup>2+</sup> ions inhibit accumulation of the phosphorylated intermediate of the wild-type PM H<sup>+</sup>-ATPase. Measurement of steady state phosphorylation levels of the purified PM H<sup>+</sup>-ATPase with varying concentrations of Tb<sup>3+</sup>, Ho<sup>3+</sup>, and Ca<sup>2+</sup> ions. Phosphorylation was initiated by addition of 1 μM [<sup>32</sup>P]ATP and was stopped after 20 seconds by acid quenching. The level of phosphorylated protein without the addition of cations was set to 100%. Blue, Ca<sup>2+</sup>; green, Tb<sup>3+</sup>; and red, Ho<sup>3+</sup>. All values are indicated ±S.D.
